# Supplementary material
Source: HighWire-hosted journal article supplement (http://www.ajevonline.org/highwire/filestream/9337/field_highwire_adjunct_files/0/266SuppFig1.pdf)
Supplement: 266SuppFig1.pdf [file 266SuppFig1.pdf]

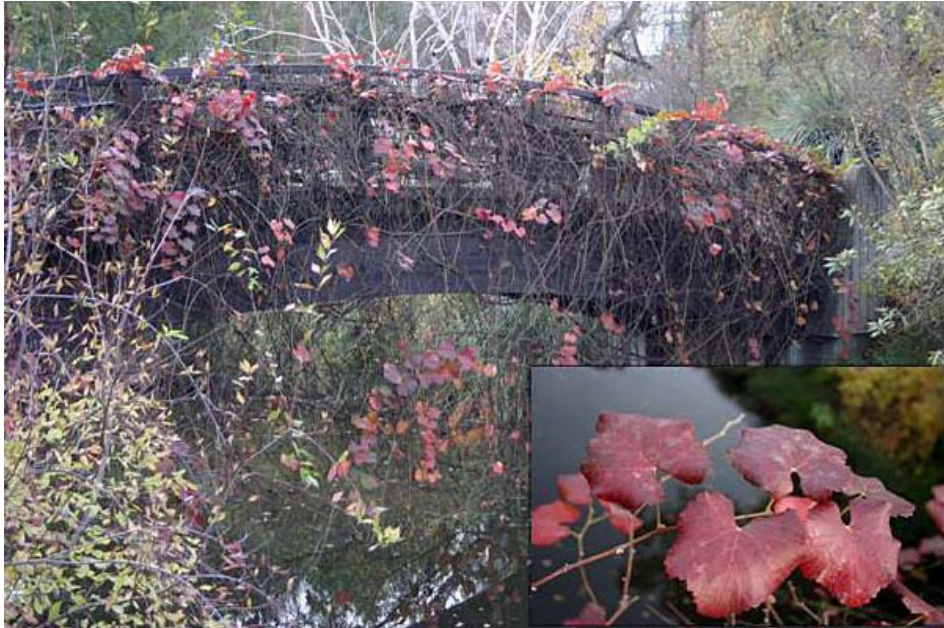

**Supplemental Figure 1** Roger's Red growing at the UC Davis Arboretum.
